# Supplementary material for: Interaction of FeO− with water: anion photoelectron spectroscopy and theoretical calculations
Source: Royal Society of Chemistry journal article supplement (doi:10.1039/c7cp03870d), 2017-01-01
Supplement: c7cp03870d1.pdf [file c7cp03870d1.pdf]

## Supplementary Information

### Interaction of $\text{FeO}^-$ with water: Anion photoelectron spectroscopy and theoretical calculations

Li-Juan Zhao,<sup>1,2</sup> Xi-Ling Xu,<sup>\*,1</sup> Hong-Guang Xu,<sup>1</sup> Gang Feng,<sup>3</sup> Wei-Jun Zheng<sup>\*,1</sup>

<sup>1</sup> *Beijing National Laboratory for Molecular Sciences, State Key Laboratory of Molecular Reaction Dynamics, Institute of Chemistry, Chinese Academy of Sciences, Beijing 100190, China*

<sup>2</sup> *University of Chinese Academy of Sciences, Beijing 100049, China*

<sup>3</sup> *School of Chemistry and Chemical Engineering, Chongqing University, Chongqing 401331, China*

\* Corresponding author. E-mail: [xlxu@iccas.ac.cn](mailto:xlxu@iccas.ac.cn), [zhengwj@iccas.ac.cn](mailto:zhengwj@iccas.ac.cn)

Tel: +86 10 62635054, Fax: +86 10 62563167

**Table S1** Relative energies, ADEs and VDEs (in eV) of the typical low-lying isomers of  $\text{FeO}^-$  and  $\text{FeO}_2\text{H}_2(\text{H}_2\text{O})_{n-1}^-$  ( $n = 1-4$ ) clusters calculated at the B3LYP/6-311+G(d, p) level, as compared to the experimental ADEs and VDEs.

| Isomer                                           | $\Delta E(\text{eV})$ | ADE(eV) |                 | VDE(eV)         |                 |
|--------------------------------------------------|-----------------------|---------|-----------------|-----------------|-----------------|
|                                                  |                       | Theo.   | Expt.           | Theo.           | Expt.           |
| $\text{FeO}^-$                                   | 0.00                  | 1.48    | $1.52 \pm 0.04$ | 1.50            | $1.52 \pm 0.04$ |
| $\text{FeO}_2\text{H}_2^-$                       | 1A                    | 0.00    | 1.18            | $1.10 \pm 0.04$ | 1.36            |
|                                                  | 1B                    | 0.00    | 1.18            |                 | 1.36            |
|                                                  | 1C                    | 1.29    | 2.62            |                 | 2.80            |
|                                                  | 1D                    | 2.01    | 1.29            |                 | 2.01            |
| $\text{FeO}_2\text{H}_2(\text{H}_2\text{O})^-$   | 2A                    | 0.00    | 1.29            | $1.48 \pm 0.04$ | 1.85            |
|                                                  | 2B                    | 0.00    | 1.29            |                 | 1.85            |
|                                                  | 2C                    | 0.79    | 2.53            |                 | 3.05            |
|                                                  | 2D                    | 0.89    | 2.36            |                 | 3.13            |
| $\text{FeO}_2\text{H}_2(\text{H}_2\text{O})_2^-$ | 3A                    | 0.00    | 1.45            | $1.85 \pm 0.04$ | 2.30            |
|                                                  | 3B                    | 0.07    | 1.13            |                 | 2.22            |
|                                                  | 3C                    | 0.11    | 1.09            |                 | 2.32            |
|                                                  | 3D                    | 0.61    | 3.11            |                 | 3.64            |
|                                                  | 3E                    | 0.77    | 2.78            |                 | 3.61            |
| $\text{FeO}_2\text{H}_2(\text{H}_2\text{O})_3^-$ | 4A                    | 0.00    | 1.30            | $2.11 \pm 0.04$ | 2.67            |
|                                                  | 4B                    | 0.02    | 2.09            |                 | 2.58            |
|                                                  | 4C                    | 0.04    | 1.25            |                 | 2.58            |
|                                                  | 4D                    | 0.05    | 1.28            |                 | 2.79            |
|                                                  | 4E                    | 0.06    | 1.16            |                 | 2.52            |
|                                                  | 4F                    | 0.07    | 1.06            |                 | 2.41            |
|                                                  | 4G                    | 0.12    | 1.10            |                 | 2.48            |
|                                                  | 4H                    | 0.15    | 0.98            |                 | 2.55            |
|                                                  | 4I                    | 0.20    | 1.61            |                 | 2.38            |
|                                                  | 4J                    | 0.55    | 2.86            |                 | 4.00            |

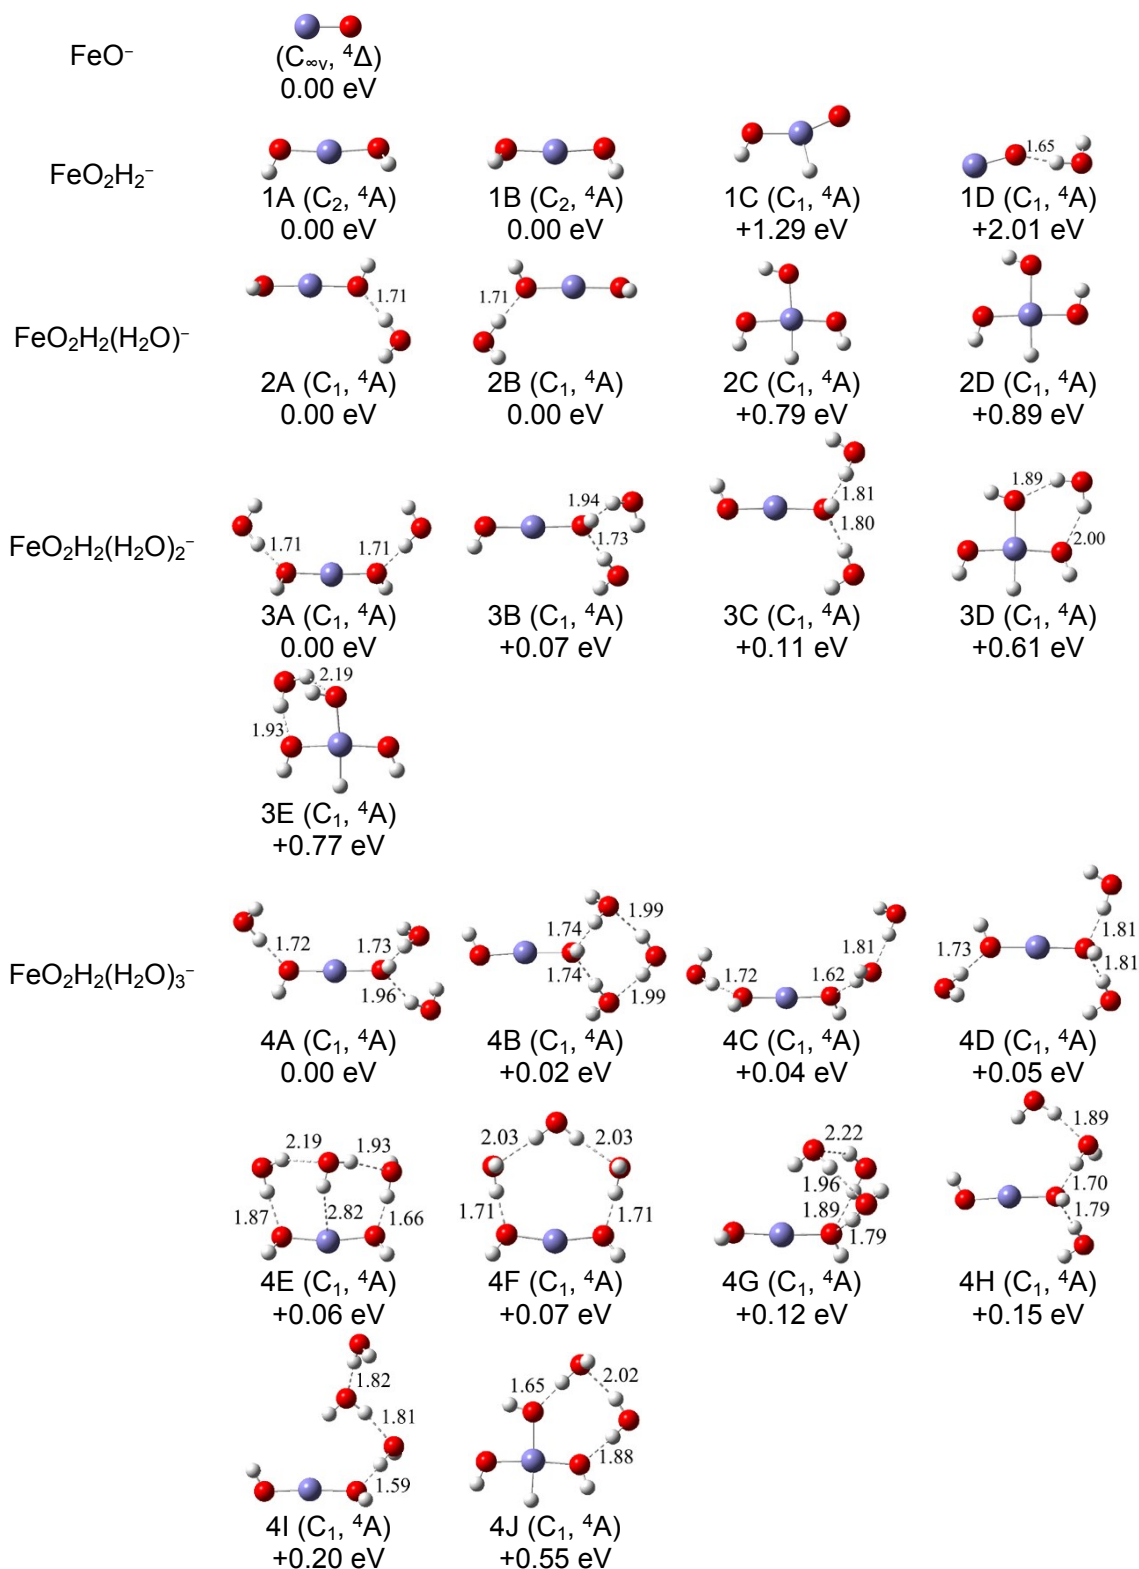

**Fig. S1** Typical low-lying isomers of  $\text{FeO}^-$  and  $\text{FeO}_2\text{H}_2(\text{H}_2\text{O})_{n-1}^-$  ( $n = 1-4$ ) clusters. The  $\text{O}\cdots\text{H}$  bond distances (in Å) are labeled. The symmetries and spin multiplicities are shown under the structures. Their relative energies (in eV) to the most stable isomers at the B3LYP/6-311+G(d, p) level are listed.

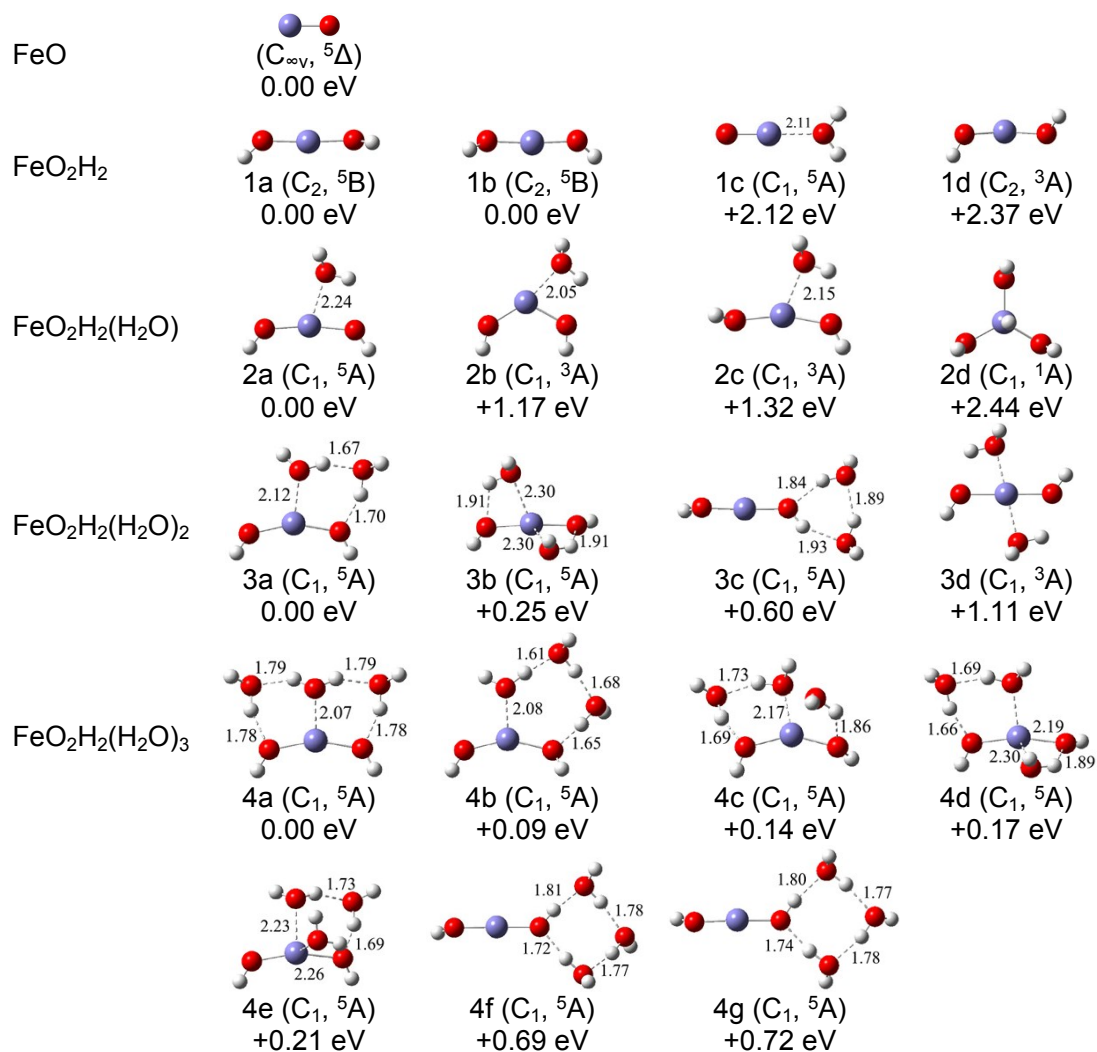

**Fig. S2** Typical low-lying isomers of FeO and FeO<sub>2</sub>H<sub>2</sub>(H<sub>2</sub>O)<sub>*n*-1</sub><sup>-</sup> (*n* = 1–4) clusters. The O···H bond distances (in Å) are labeled. The symmetries and spin multiplicities are shown under the structures. Their relative energies (in eV) to the most stable isomers at the B3LYP/6-311+G(d, p) level are listed.

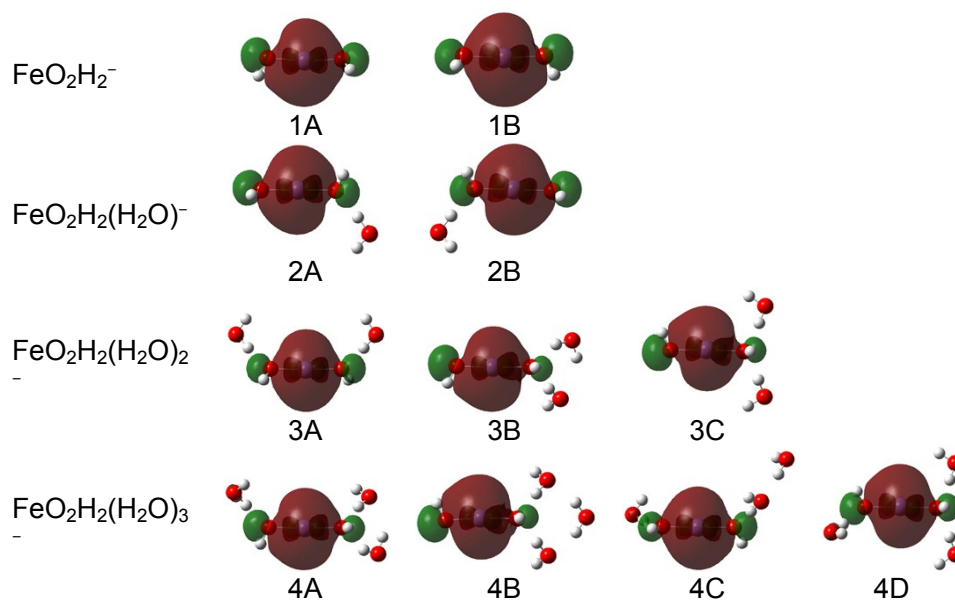

**Fig. S3** Highest occupied molecular orbitals (HOMOs) of the typical isomers of  $\text{FeO}_2\text{H}_2(\text{H}_2\text{O})_{n-1}^-$  ( $n = 1-4$ ).
